# Supplementary figures and images for: Identification of two novel peptides with antioxidant activity and their potential in inhibiting amyloid-β aggregation in vitro
Source: Royal Society of Chemistry journal article supplement (doi:10.1039/c8fo01491d), 2019-01-01

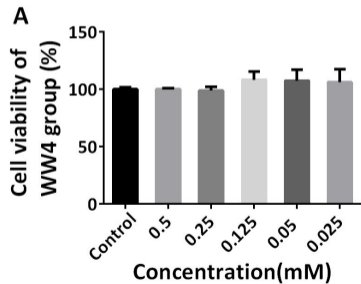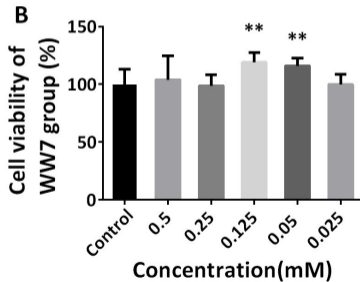

Supplement: c8fo01491d2.pdf [file c8fo01491d2.pdf]
